# Supplementary material
Source: publisher figshare collection journal article supplement (https://acs.figshare.com/ndownloader/files/12778451)
Supplement: Supplementary file 1 [file 12778451]

# Supporting Information

## Conducting PEDOT Nanoparticles: Controlling Colloidal Stability and Electrical Properties

Mario Culebras,<sup>†,‡</sup> José F. Serrano-Claumarchirant,<sup>†</sup> Maria J. Sanchis,<sup>¶</sup> Katharina Landfester,<sup>§</sup> Andrés Cantarero,<sup>||</sup> Clara M. Gómez,<sup>†</sup> and Rafael Muñoz-Espí<sup>\*†</sup>

<sup>†</sup> *Institute of Materials Science (ICMUV), Universitat de València,  
c/ Catedràtic José Beltrán 2, 46980 Paterna, Spain*

<sup>‡</sup> *Stokes Laboratories, Bernal Institute, University of Limerick, Ireland*

<sup>¶</sup> *Department of Applied Thermodynamics, ETSII, Institute of Electric Technology,  
Universitat Politècnica de València, 46022 València, Spain.*

<sup>§</sup> *Max Planck Institute for Polymer Research, Ackermannweg 10, Mainz 55128, Germany*

<sup>||</sup> *Institute for Molecular Sciences (ICMol), Universitat de València, c/ Catedràtic José  
Beltrán 2, 46980 Paterna, Spain*

\* E-mail: rafael.munoz@uv.es

## Photographs showing the Macroscopic Stability

(a)

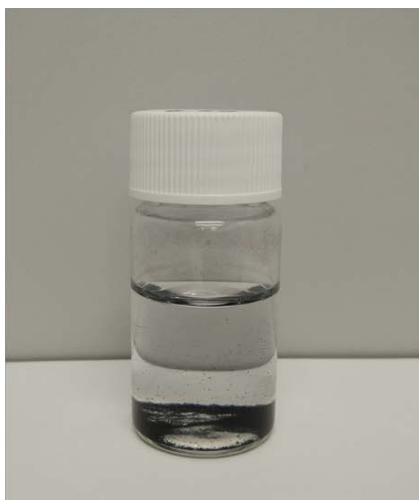

(b)

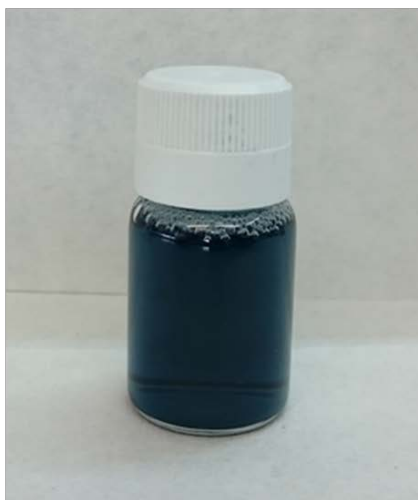

**Figure S1.** Images of PEDOT nanoparticle suspensions prepared at EDOT:FeTos molar ratio of 1:1: (a) without H<sub>2</sub>O<sub>2</sub> and (b) with H<sub>2</sub>O<sub>2</sub>.

## SEM Images

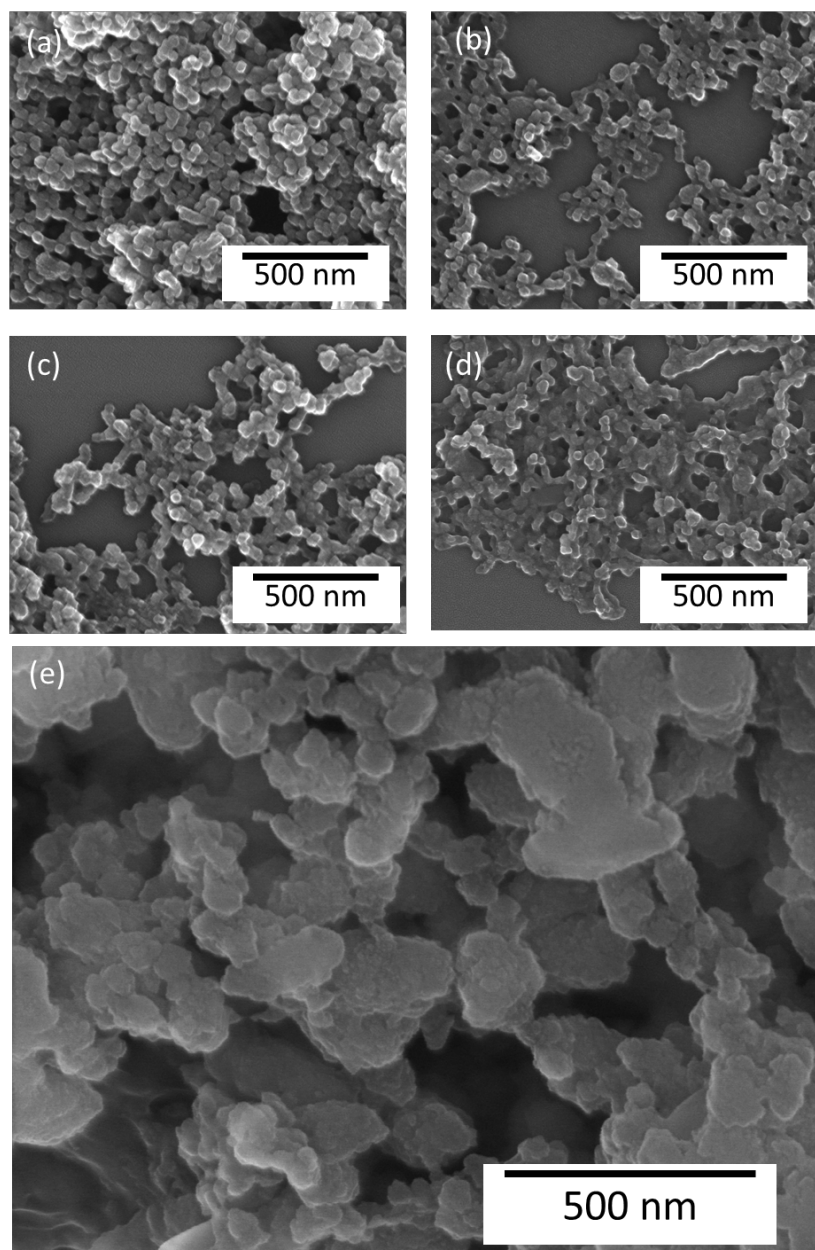

**Figure S2.** SEM images of PEDOT nanoparticles with  $\text{H}_2\text{O}_2$  (molar ratio EDOT:FeTos 1:1): (a)  $7.5 \times 10^{-2}$  M (b)  $3.7 \times 10^{-2}$  M, (c)  $1.5 \times 10^{-2}$  M, (d)  $7.5 \times 10^{-3}$  M, and (e) without  $\text{H}_2\text{O}_2$ .

## FTIR analysis

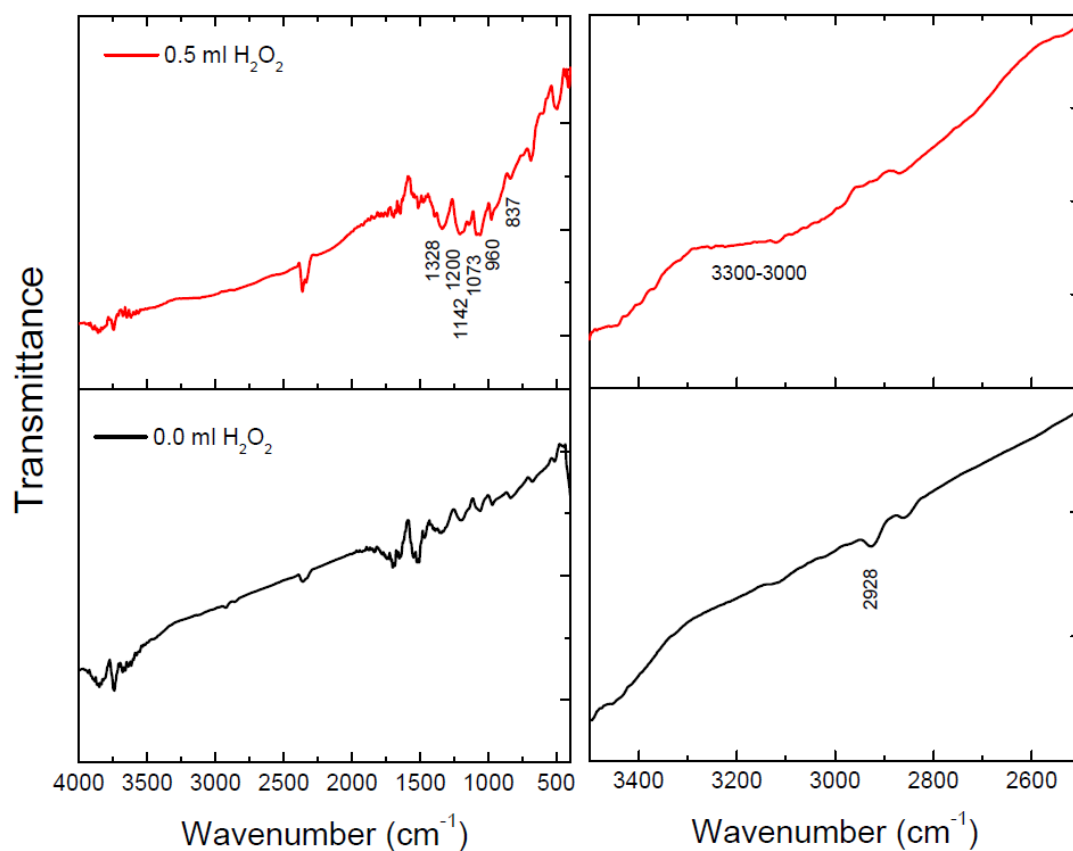

**Figure S3.** FTIR spectra of nanoparticles, without and with  $7.5 \times 10^{-2}$  M of  $\text{H}_2\text{O}_2$ , from 4000 to 400  $\text{cm}^{-1}$  and for a zoom in the region between 3500 and 2500  $\text{cm}^{-1}$ .

FTIR analysis was recorded for PEDOT nanoparticles to evidence the presence of hydroxyl groups in the polymer backbone. The typical vibrational modes of PEDOT are observed. At  $1328 \text{ cm}^{-1}$ , the C=C stretching appears; the bands at 1200, 1142, and  $1073 \text{ cm}^{-1}$  correspond to the C–O–C bond stretching in the ethylene dioxy(alkylenedioxy) group. The bands at 960 and  $837 \text{ cm}^{-1}$  correspond to the presence of the C–S bond in the thiophene ring. In the region between 3500 and  $2500 \text{ cm}^{-1}$ , a band related to the C–H stretching is observed at  $2928 \text{ cm}^{-1}$  in the sample without  $\text{H}_2\text{O}_2$ . However, in nanoparticles prepared with  $\text{H}_2\text{O}_2$ , a broad band in the range of  $3300\text{--}3000 \text{ cm}^{-1}$  is present, ascribable to hydroxide groups in the polymer chains.
